# Supplementary material for: A high performance thermal expansion offset composite cathode for IT-SOFCs
Source: Royal Society of Chemistry journal article supplement (doi:10.1039/d2ta04899j), 2022-01-01
Supplement: d2ta04899j1.pdf [file d2ta04899j1.pdf]

## Supplementary materials

### A high performance thermal expansion offset composite cathode for IT-SOFCs

Kang Liu<sup>1,2</sup>, Fei Lu<sup>1,2</sup>, Xusheng Jia<sup>1,2</sup>, Hao He<sup>1</sup>, Jinrui Su<sup>1</sup>, and Bin Cai<sup>1,2\*</sup>

<sup>1</sup> Key Laboratory of Material Physics, Ministry of Education, School of Physics and Microelectronics, Zhengzhou University, Zhengzhou 450052, China

<sup>2</sup> Institute of Intelligent Sensing, Zhengzhou University, Zhengzhou 450001, China

\*Corresponding author: Prof. Dr. Bin Cai (B. Cai), bcai@zzu.edu.cn (OCRID: 0000-0002-8587-0181)

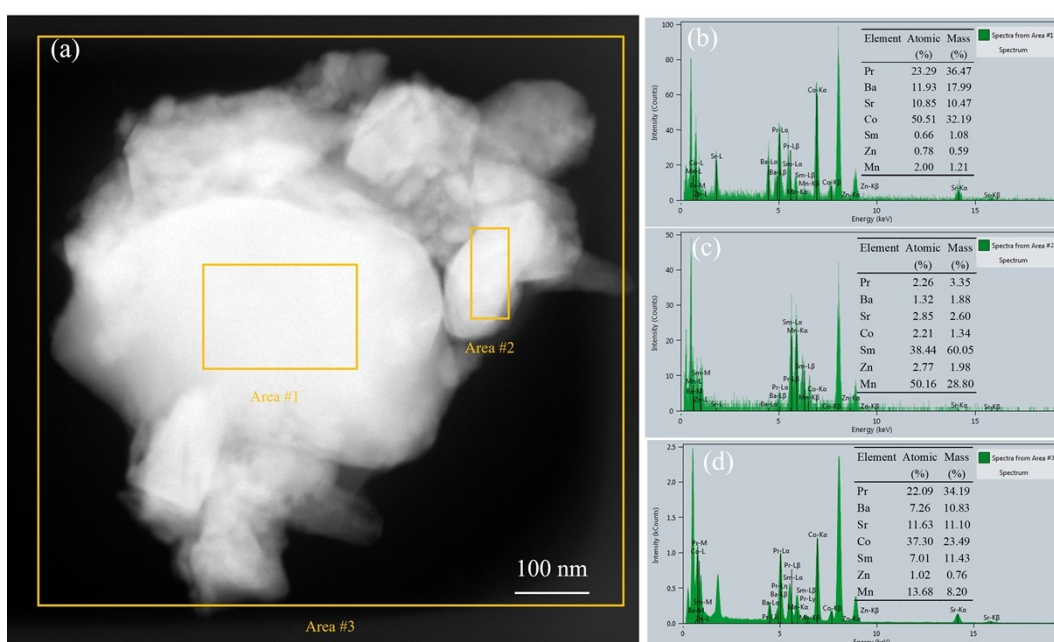

Fig. S1 STEM micrograph of PBSC-SZM (a), EDS scanning results of area #1 (b), area #2 (c) and area #3 (d).

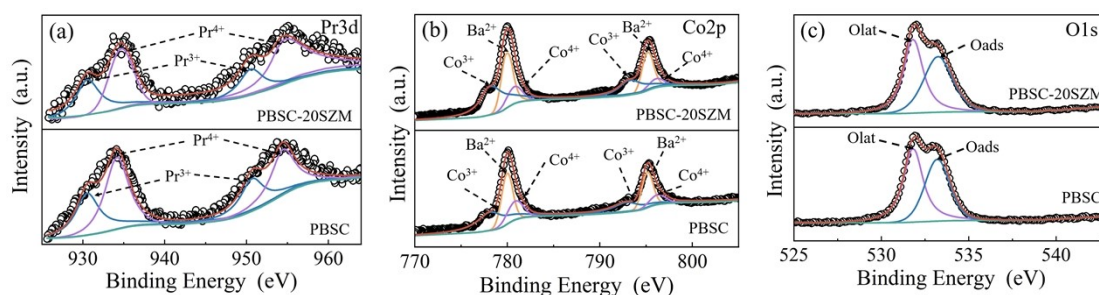

Fig. S2 XPS spectra of (a) Pr 3d, (b) Ba 3d and Co 2p, and (c) O 1s for both PBSC-20SZM and PBSC.

Table S1 Fitted binding energy and ratio of Pr, Co, Ba and O with different status.

| Element |                  | PBSC                                                       |                                                      |       | PBSC-20SZM                                                  |                                                       |       |
|---------|------------------|------------------------------------------------------------|------------------------------------------------------|-------|-------------------------------------------------------------|-------------------------------------------------------|-------|
|         |                  | Binding energy (eV)                                        |                                                      | at.%  | Binding energy (eV)                                         |                                                       | at.%  |
|         |                  | Pr and Ba 3d <sub>3/2</sub> ,<br>Co2p <sub>1/2</sub> , O1s | Pr and Ba 3d <sub>5/2</sub> ,<br>Co2p <sub>3/2</sub> |       | Pr and Ba 3d <sub>3/2</sub> ,<br>Co 2p <sub>1/2</sub> , O1s | Pr and Ba 3d <sub>5/2</sub> ,<br>Co 2p <sub>3/2</sub> |       |
| Pr      | Pr <sup>3+</sup> | 949.8                                                      | 929.5                                                | 48.65 | 949.9                                                       | 929.6                                                 | 48.48 |
|         | Pr <sup>4+</sup> | 954.2                                                      | 933.6                                                | 51.35 | 954.4                                                       | 933.9                                                 | 51.52 |
| Ba      | Ba <sup>2+</sup> | 795.1                                                      | 780.1                                                | -     | 795.1                                                       | 780.1                                                 | -     |
| Co      | Co <sup>3+</sup> | 793.1                                                      | 778.1                                                | 76.91 | 792.8                                                       | 778.8                                                 | 77.74 |
|         | Co <sup>4+</sup> | 796.1                                                      | 780.8                                                | 23.09 | 796.2                                                       | 780.9                                                 | 22.26 |
| O       | O <sub>lat</sub> | 531.8                                                      | -                                                    | 70.29 | 531.7                                                       | -                                                     | 70.97 |
|         | O <sub>ads</sub> | 533.3                                                      | -                                                    | 29.71 | 533.2                                                       | -                                                     | 29.03 |

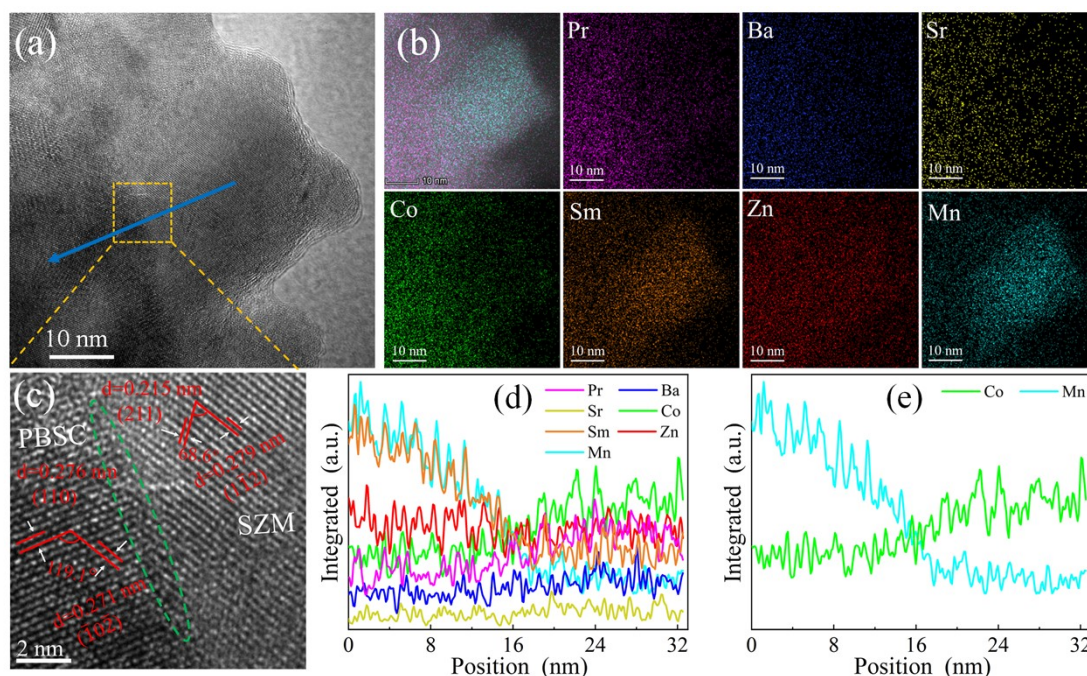

Fig. S3 HRTEM image of PBSC-SZM powder (a), corresponding EDS-mapping (b), lattice fringe image PBSC-SZM (c) of region shown in (a), the relative content of all metal elements (d) and only Co and Mn (e) as a function of position by EDS line scanning of blue arrow shown in (a).

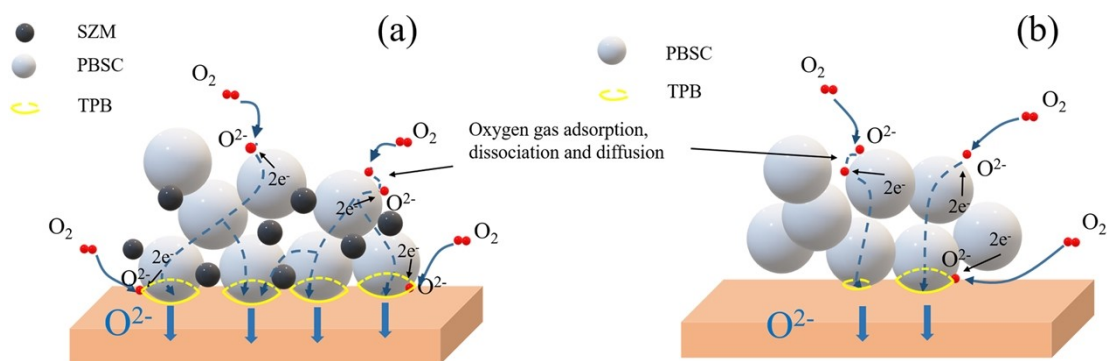

Fig. S4 Schematic illustration on the effect of SZM addition in PBSC cathode on the transportation channels and TPB length. (a) PBSC-20SZM and (b) PBSC cathodes.

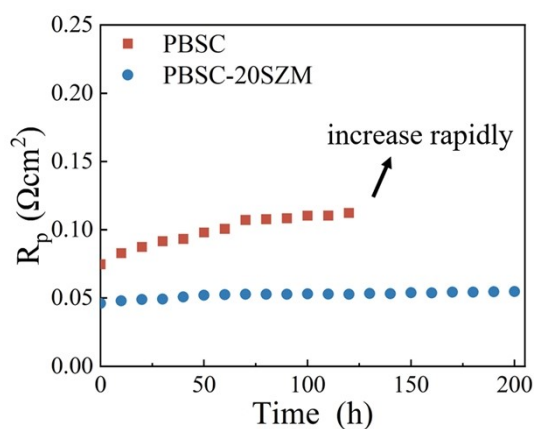

Fig. S5 Polarization resistance  $R_p$  as a function of working time for single cells with PBSC and PBSC-20SZM cathodes.

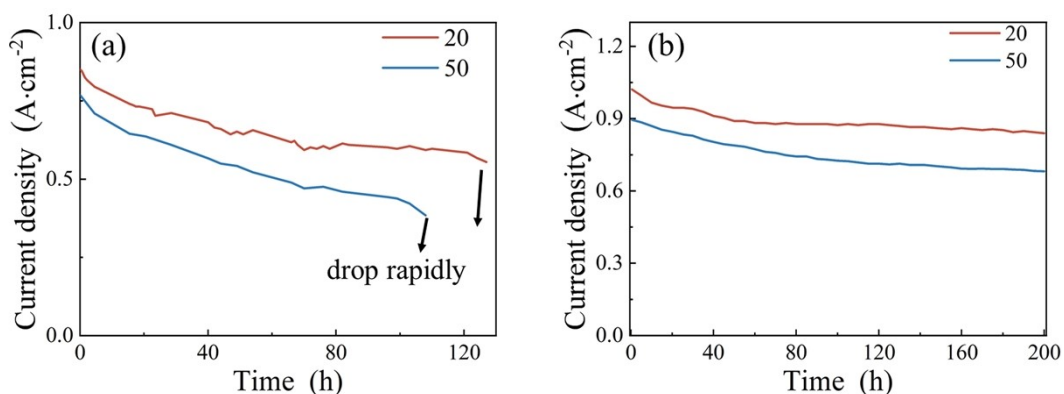

Fig. S6 Effects of cathode thicknesses (20 and 50  $\mu\text{m}$ ) on long-term stability of single cells with (a) PBSC and (b) PBSC-20SZM cathodes tested at a constant cell voltage of 0.7 V and 873 K.

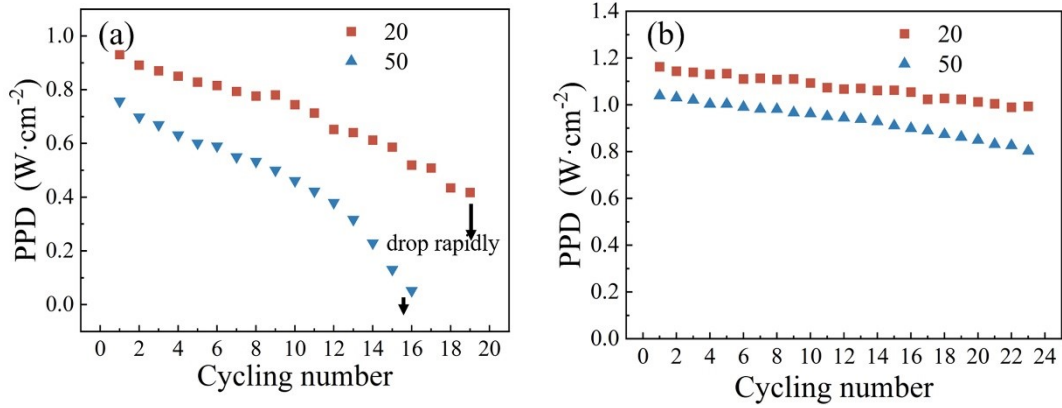

Fig. S7 Effects of cathode thicknesses (20 and 50  $\mu\text{m}$ ) on performance of single cells with (a) PBSC and (b) PBSC-20SZM during thermal cycling between 723 and 873 K with heating and cooling rates of  $10\text{ K min}^{-1}$ . Output PPD was recorded at 873 K.

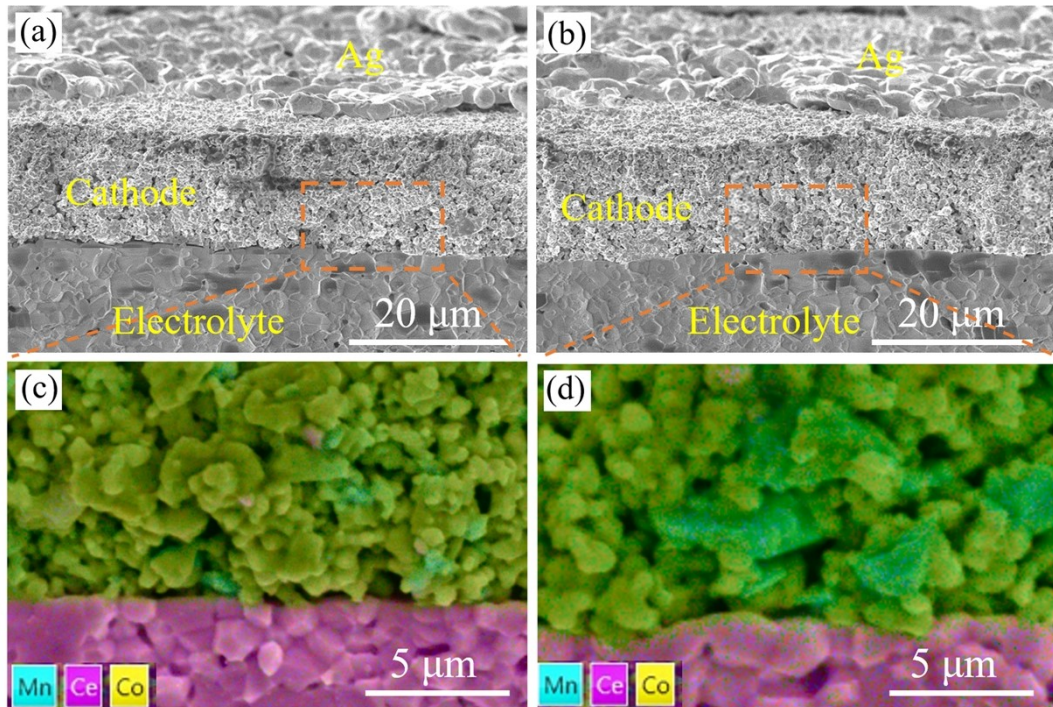

Fig. S8 Cross-sectional SEM micrographs and local area EDS mapping of single cells with PBSC-10SZM (a and c) and PBSC-30SZM (b and d) tested for 5 h at 0.7 V and 873 K.

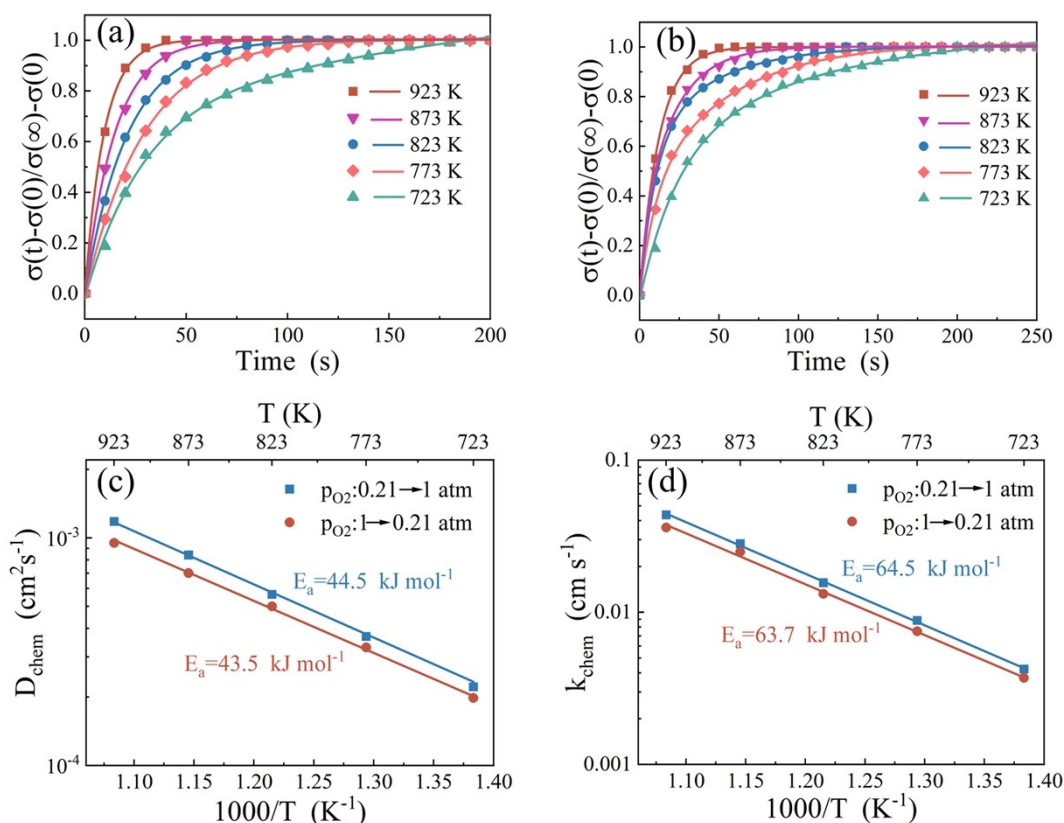

Fig. S9 ECR responses curves of PBSC at various temperatures after an abrupt change in the oxygen partial pressure from 0.21 to 1 atm (a) and its reduction step (b). Arrhenius plots of  $D_{\text{chem}}$  (c) and  $k_{\text{chem}}$  (d) of PBSC oxides from ECR method.

Table S2  $D_{\text{chem}}$  and  $k_{\text{chem}}$  data of PBSC and PBSC-20SZM at 723-923 K.

| T<br>(K) | Sample     | oxidation step                                                 |                                                      | reduction step                                                 |                                                      |
|----------|------------|----------------------------------------------------------------|------------------------------------------------------|----------------------------------------------------------------|------------------------------------------------------|
|          |            | $D_{\text{chem}}$<br>( $10^{-4} \text{ cm}^2 \text{ s}^{-1}$ ) | $k_{\text{chem}}$<br>( $10^{-3} \text{ cm s}^{-1}$ ) | $D_{\text{chem}}$<br>( $10^{-4} \text{ cm}^2 \text{ s}^{-1}$ ) | $k_{\text{chem}}$<br>( $10^{-3} \text{ cm s}^{-1}$ ) |
| 723      | PBSC       | 2.21                                                           | 4.23                                                 | 1.99                                                           | 3.74                                                 |
|          | PBSC-20SZM | 1.15                                                           | 3.10                                                 | 0.926                                                          | 2.55                                                 |
| 773      | PBSC       | 3.68                                                           | 7.83                                                 | 3.36                                                           | 7.54                                                 |
|          | PBSC-20SZM | 1.49                                                           | 5.17                                                 | 1.27                                                           | 4.37                                                 |
| 823      | PBSC       | 5.64                                                           | 14.6                                                 | 5.08                                                           | 13.2                                                 |
|          | PBSC-20SZM | 2.28                                                           | 8.08                                                 | 1.98                                                           | 7.16                                                 |
| 873      | PBSC       | 7.41                                                           | 22.2                                                 | 6.17                                                           | 23.8                                                 |
|          | PBSC-20SZM | 2.99                                                           | 15.5                                                 | 2.07                                                           | 10.1                                                 |
| 923      | PBSC       | 11.5                                                           | 43.7                                                 | 9.55                                                           | 36.2                                                 |
|          | PBSC-20SZM | 5.15                                                           | 24.1                                                 | 4.05                                                           | 19.3                                                 |
